# Supplementary material for: Metabolic profiling of (poly)phenolic compounds in mouse urine following consumption of hull-less and purple-grain barley
Source: Royal Society of Chemistry journal article supplement (doi:10.1039/d4fo01275e), 2024-01-01
Supplement: d4fo01275e1.pdf [file d4fo01275e1.pdf]

**Supplemental Table 1.** Purified standard diet (SD) composition and nutrient information.

| <b>FORMULA</b>                  | <b>g/Kg</b> |  |
|---------------------------------|-------------|--|
| Casein                          | 200         |  |
| L-cystine                       | 3.00        |  |
| Corn starch                     | 397         |  |
| Maltodextrin                    | 132         |  |
| Sucrose                         | 100         |  |
| Soybean oil                     | 70.0        |  |
| Cellulose                       | 50.0        |  |
| Mineral mix, AIN-93G-MX (94046) | 35.0        |  |
| Vitamin Mix, AIN-93-VX (94047)  | 10.0        |  |
| Choline bitartrate              | 2.50        |  |
| TBHQ, antioxidant               | 0.01        |  |

  

| <b>Purified STD diet</b> | <b>% by weight</b> | <b>% Kcal from</b> |
|--------------------------|--------------------|--------------------|
| Protein                  | 17.7               | 18.8               |
| Carbohydrate             | 60.1               | 63.9               |
| Fat                      | 7.20               | 17.2               |
| Kcal/g                   | 3.80               |                    |

  

| <b>Whole grain barley</b>                                 | <b>% by weight</b> | <b>% Kcal from</b> |
|-----------------------------------------------------------|--------------------|--------------------|
| Protein                                                   | 13.6               | 14.7               |
| Total carbohydrate*                                       | 75.0               | 81.3               |
| Total fat                                                 | 1.60               | 3.90               |
| Kcal/g                                                    | 3.69               |                    |
| Ash                                                       | 1.60               |                    |
| Moisture                                                  | 8.20               |                    |
| Major dietary fiber<br>( $\beta$ -glucan + arabinoxylans) | 12.2               |                    |

\*Carbohydrate by calculation = (100-Ash%-total fat%-protein%-moisture%).

The moisture content was evaluated using the Moisture Tester MT-CA (Brabender GmbH&Co KG, Duisburg, Germany). The ash content was determined by incineration (ISO 2171:2023). The Dumas combustion method was used to quantify the nitrogen contents using a Nitrogen/Protein Analyzer (CN628, LECO Corporation, St. Joseph, MI, U.S.A.) following AACC Method 46–30.01. The nitrogen contents were converted to crude protein by multiplying with a conversion factor of 5.88 (ISO 16634-1: 2008). Soxhlet method was applied for the determination of total fat, adapted by the Randall extraction method (ISO 11085:2015). Briefly, 3 g sample were extracted with hexane in the Det-Gras device (JP SELECTA, Spain), the solvent was evaporated, the extracted fat was dried, and the % fat was obtained by gravimetry. The  $\beta$ -glucan and arabinoxylan contents were determined by means of the mixed-linkage  $\beta$ -glucan assay (K-BGLU) and D-xylose assay (K-XYLOSE) kits from Megazyme (Wicklow, Ireland).

**Supplemental Table 2.** SRM conditions used for the quantification of (poly)phenolic compounds in barley samples and its generated metabolites in urine samples.

| <b>(Poly)phenolic compounds and its generated metabolites</b>                                 | <b>SRM quantification</b> | <b>CV (V) / CE (eV)</b> |
|-----------------------------------------------------------------------------------------------|---------------------------|-------------------------|
| <b>Benzene-1,2-diols</b>                                                                      |                           |                         |
| Benzene-1,2-diol- <i>O</i> -sulphate                                                          | 189 > 109                 | 20 / 15                 |
| Methyl benzene-1,2-diol- <i>O</i> -sulphate                                                   | 203 > 123                 | 20 / 15                 |
| <b>Benzoic acids</b>                                                                          |                           |                         |
| 4-Hydroxybenzoic acid                                                                         | 137 > 93                  | 30 / 15                 |
| Hydroxybenzoic acid                                                                           | 137 > 93                  | 30 / 15                 |
| 4-Hydroxybenzoic acid- <i>O</i> -sulphate                                                     | 217 > 137                 | 35 / 15                 |
| Hippuric acid                                                                                 | 178 > 134                 | 40 / 10                 |
| 3,4-Dihydroxybenzoic acid                                                                     | 153 > 109                 | 45 / 15                 |
| 3,4-Dihydroxybenzoic acid- <i>O</i> -sulphate                                                 | 233 > 153                 | 35 / 15                 |
| 4-Hydroxy-3-methoxybenzoic acid                                                               | 167 > 123                 | 30 / 10                 |
| 4-Hydroxy-3-methoxybenzoic acid- <i>O</i> -sulphate                                           | 247 > 167                 | 30 / 25                 |
| 3,5-Dimethoxy-4-hydroxybenzoic acid                                                           | 197 > 182                 | 30 / 10                 |
| <b>Hydroxycinnamic acid derivatives</b>                                                       |                           |                         |
| Cinnamic acid                                                                                 | 147 > 103                 | 45 / 15                 |
| Hydroxycinnamic acid (2',4')                                                                  | 163 > 119                 | 35 / 10                 |
| Hydroxycinnamic acid- <i>O</i> -sulphate                                                      | 243 > 163                 | 35 / 15                 |
| 3',4'-Dihydroxycinnamic acid                                                                  | 179 > 179                 | 35 / 15                 |
| 3',4'-Dihydroxycinnamic acid- <i>O</i> -sulphate                                              | 259 > 179                 | 35 / 15                 |
| 4'-Hydroxy-3'-methoxycinnamic acid                                                            | 193 > 134                 | 30 / 15                 |
| 3'-Hydroxy-4'-methoxycinnamic acid                                                            | 193 > 134                 | 30 / 15                 |
| 3,5-dimethoxy-4-hydroxycinnamic acid                                                          | 223 > 164                 | 45 / 15                 |
| 4'-Hydroxy-3'-methoxycinnamic acid glycine                                                    | 250 > 149                 | 40 / 15                 |
| 8/5-5'-Diferulic acid                                                                         | 385 > 341                 | 40 / 15                 |
| Diferulic acid (decarboxylated form)                                                          | 341 > 282                 | 40 / 15                 |
| Triferulic acid                                                                               | 577 > 355                 | 50 / 20                 |
| 4'-Hydroxy-3'-methoxycinnamic acid- <i>O</i> -sulphate                                        | 273 > 193                 | 40 / 10                 |
| 3'-Hydroxy-4'-methoxycinnamic acid- <i>O</i> -sulphate                                        | 273 > 193                 | 40 / 10                 |
| 4'-Hydroxy-3'-methoxycinnamic acid- <i>O</i> -glucuronide                                     | 369 > 193                 | 40 / 10                 |
| 3-(4'-Hydroxy-3'-methoxyphenyl)propanoic acid                                                 | 195 > 135                 | 35 / 15                 |
| 3-(4'-Hydroxy-3'-methoxyphenyl)propanoic acid- <i>O</i> -sulphate                             | 275 > 195                 | 35 / 15                 |
| 3-(4'-Hydroxy-3'-methoxyphenyl)propanoic acid- <i>O</i> -glucuronide                          | 371 > 195                 | 35 / 15                 |
| <b>Flavan-3-ols</b>                                                                           |                           |                         |
| Catechin                                                                                      | 289 > 245                 | 45 / 15                 |
| Catechin- <i>O</i> -glucoside                                                                 | 451 > 289                 | 45 / 15                 |
| Procyanidin diglucoside                                                                       | 613 > 451                 | 45 / 15                 |
| Procyanidin B2                                                                                | 577 > 289                 | 45 / 20                 |
| Prodelfinidin B3 (GC-C)                                                                       | 593 > 289                 | 45 / 20                 |
| Procyanidin B3 (C-C)                                                                          | 577 > 289                 | 45 / 20                 |
| Prodelfinidin B4 (GC-C)                                                                       | 593 > 289                 | 45 / 20                 |
| Procyanidin C2 (C-C-C)                                                                        | 865 > 289                 | 60 / 30                 |
| Prodelfinidin C2 (GC-GC-C)                                                                    | 897 > 593                 | 60 / 25                 |
| C-C-GC/GC-C-C                                                                                 | 881 > 577                 | 60 / 25                 |
| C-GC-C                                                                                        | 881 > 593                 | 60 / 25                 |
| Catechin- <i>O</i> -sulphate                                                                  | 369 > 289                 | 40 / 20                 |
| Epicatechin- <i>O</i> -sulphate                                                               | 369 > 289                 | 40 / 20                 |
| Methyl catechin- <i>O</i> -sulphate                                                           | 383 > 303                 | 40 / 15                 |
| Methyl epicatechin- <i>O</i> -sulphate                                                        | 383 > 303                 | 40 / 15                 |
| Methyl catechin- <i>O</i> -glucuronide                                                        | 479 > 303                 | 40 / 20                 |
| Methyl epicatechin- <i>O</i> -glucuronide                                                     | 479 > 303                 | 40 / 20                 |
| <b>Phenyl-<math>\gamma</math>-valerolactone derivatives</b>                                   |                           |                         |
| 5-(4'-Hydroxyphenyl)- $\gamma$ -valerolactone- <i>O</i> -sulphate                             | 271 > 191                 | 40 / 20                 |
| 5-(3',4'-Dihydroxyphenyl)- $\gamma$ -valerolactone- <i>O</i> -sulphate                        | 287 > 207                 | 40 / 15                 |
| 5-(3',4'-Dihydroxyphenyl)- $\gamma$ -valerolactone- <i>O</i> -glucuronide                     | 383 > 207                 | 40 / 20                 |
| 5-(3',4'-Dihydroxyphenyl)- $\gamma$ -valerolactone- <i>O</i> -sulphate- <i>O</i> -glucuronide | 463 > 207                 | 40 / 20                 |
| <b>Phenylacetic acids</b>                                                                     |                           |                         |
| Hydroxyphenylacetic acid- <i>O</i> -glucuronide                                               | 327 > 151                 | 20 / 15                 |
| Dihydroxyphenylacetic acid- <i>O</i> -sulphate                                                | 247 > 167                 | 30 / 15                 |
| <b>Phenylpropanoic acids</b>                                                                  |                           |                         |
| Hydroxyphenylpropanoic acid- <i>O</i> -sulphate                                               | 245 > 165                 | 35 / 15                 |
| Hydroxyphenylpropanoic acid- <i>O</i> -glucuronide                                            | 341 > 165                 | 40 / 25                 |
| Dihydroxyphenylpropanoic acid- <i>O</i> -sulphate                                             | 261 > 181                 | 40 / 15                 |

**Flavone glucosides**

|                                        |           |         |
|----------------------------------------|-----------|---------|
| Isoorientin (luteolin-6-C-glucoside)   | 447 > 357 | 50 / 20 |
| Isovitexin-O-glucoside                 | 593 > 431 | 60 / 20 |
| Isovitexin-O-rutinoside                | 739 > 431 | 60 / 20 |
| Apigenin-O-glucoside                   | 431 > 269 | 45 / 15 |
| Apigenin-6-C-arabinoside-8-C-glucoside | 563 > 353 | 60 / 20 |
| Isoscoparin-7-O-glucoside              | 623 > 341 | 60 / 20 |
| Isoscoparin-7-O-rutinoside             | 769 > 461 | 60 / 20 |
| Luteolin-O-glucoside                   | 447 > 285 | 45 / 25 |

**Anthocyanins \***

|                                 |           |         |
|---------------------------------|-----------|---------|
| Cyanidin-3-O-arabinoside        | 419 > 287 | 40 / 20 |
| Cyanidin-3-O-glucoside          | 449 > 287 | 40 / 20 |
| Cyanidin-O-malonylglucoside     | 593 > 287 | 40 / 15 |
| Cyanidin-O-dimalonylglucoside   | 621 > 287 | 40 / 20 |
| Peonidin-3-O-glucoside          | 463 > 301 | 40 / 20 |
| Peonidin-O-malonylglucoside     | 549 > 301 | 40 / 20 |
| Peonidin-O-dimalonylglucoside   | 635 > 301 | 40 / 20 |
| Peonidin-3-O-glucuronide        | 477 > 301 | 40 / 20 |
| Delphinidin-3-O-glucoside       | 465 > 303 | 40 / 20 |
| Pelargonidin-3-O-glucoside      | 463 > 271 | 40 / 20 |
| Pelargonidin-O-malonylglucoside | 519 > 271 | 40 / 25 |
| Malvidin-3-O-glucoside          | 493 > 331 | 40 / 20 |

---

CV: Cone voltage; CE: Collision energy; Anthocyanins\*: positive ionization

**Supplemental Table 3.** Instrumental response of the main generated (poly)phenolic metabolites in mice urine samples after the sustained intake of standard diet (SD) and the barley supplemented diet (WGB).

| <b>(Poly)phenolic metabolites</b>                                                     | <b>SD</b> | <b>WGB</b> | <b>% Signal increase</b> |
|---------------------------------------------------------------------------------------|-----------|------------|--------------------------|
| <b>Anthocyanins</b>                                                                   |           |            |                          |
| Cyanidin-3-O-glucoside                                                                | n.d.      | 887        | 100                      |
| Cyanidin-3-O-6"-O-malonylglucoside                                                    | n.d.      | 2059       | 100                      |
| Cyanidin-3-O-(3",6")-dimalonylglucoside                                               | n.d.      | 1577       | 100                      |
| Peonidin-3-O-glucoside                                                                | n.d.      | 3241       | 100                      |
| Peonidin-3-O-6"-O-malonylglucoside                                                    | n.d.      | 4642       | 100                      |
| Peonidin-3-O-(3",6")-dimalonylglucoside                                               | n.d.      | 2108       | 100                      |
| Peonidin-3-O-glucuronide                                                              | n.d.      | 4939       | 100                      |
| Pelargonidin-3-O-6"-O-malonylglucoside                                                | n.d.      | 181        | 100                      |
| <b>Benzene-1,2-diols</b>                                                              |           |            |                          |
| Benzene-1,2-diol-O-sulphate ( <i>aka</i> catechol)                                    | 2478      | 37994      | 93                       |
| Methyl benzene-1,2-diol-O-sulphate ( <i>aka</i> Me catechol S)                        | 29711     | 41710      | 29                       |
| <b>Phenolic acids</b>                                                                 |           |            |                          |
| Hydroxybenzoic acid-O-sulphate                                                        | 7096      | 24923      | 72                       |
| 3,4-Dihydroxybenzoic acid-O-sulphate ( <i>aka</i> PCA S)                              | 5632      | 54770      | 90                       |
| 3,5-Dimethoxy-4-hydroxybenzoic acid ( <i>aka</i> Syr)                                 | 138       | 449        | 69                       |
| 4-Hydroxy-3-methoxybenzoic acid-O-sulphate ( <i>aka</i> VA S)                         | 1450      | 11944      | 88                       |
| Hippuric acid                                                                         | 49173     | 299964     | 84                       |
| 4'-Hydroxycinnamic acid-O-sulphate ( <i>aka</i> coumaric acid S)                      | 9945      | 20200      | 51                       |
| 3',4'-Dihydroxycinnamic acid ( <i>aka</i> CA)                                         | 27087     | 40975      | 34                       |
| 3',4'-Dihydroxycinnamic acid-O-sulphate ( <i>aka</i> CA S)                            | n.d.      | 3804       | 100                      |
| 4'-Hydroxy-3'-methoxycinnamic acid ( <i>aka</i> FA)                                   | 169       | 454        | 63                       |
| 4'-Hydroxy-3'-methoxycinnamic acid-O-sulphate ( <i>aka</i> FA S)                      | 24814     | 133015     | 81                       |
| 3'-Hydroxy-4'-methoxycinnamic acid-O-sulphate ( <i>aka</i> isoFA S)                   | 3345      | 10235      | 67                       |
| 4'-Hydroxy-3'-methoxycinnamic acid-O-glucuronide ( <i>aka</i> FA G)                   | 91        | 667        | 86                       |
| 3-(4'-Hydroxy-3'-methoxyphenyl)propanoic acid ( <i>aka</i> dihydroFA)                 | n.d.      | 154        | 100                      |
| 3-(4'-Hdroxy-3'-methoxyphenyl)propanoic acid-O-sulphate ( <i>aka</i> dihydroFA S)     | 3366      | 85240      | 96                       |
| 3-(4'-Hydroxy-3'-methoxyphenyl)propanoic acid-O-glucuronide ( <i>aka</i> dihydroFA G) | n.d.      | 458        | 100                      |
| 4'-Hydroxy-3'-methoxycinnamic acid glycine ( <i>aka</i> FA Gly)                       | n.d.      | 1000       | 100                      |
| 3,5-Dimethoxy-4-hydroxycinnamic acid ( <i>sinapic acid</i> )                          | n.d.      | 862        | 100                      |
| Hydroxyphenylacetic acid-O-glucuronide                                                | n.d.      | 273        | 100                      |
| Dihydroxyphenylacetic acid-O-sulphate                                                 | 392       | 8258       | 95                       |
| Hydroxyphenylpropanoic acid-O-sulphate                                                | 27786     | 779707     | 96                       |
| Hydroxyphenylpropanoic acid-O-glucuronide                                             | n.d.      | 234        | 100                      |
| Dihydroxyphenylpropanoic acid-O-sulphate                                              | 2750      | 24923      | 91                       |
| <b>Flavan-3-ols</b>                                                                   |           |            |                          |
| Catechin-O-sulphate                                                                   | n.d.      | 1651       | 100                      |
| Epicatechin-O-sulphate                                                                | n.d.      | 776        | 100                      |
| Methyl catechin-O-sulphate                                                            | n.d.      | 1174       | 100                      |
| Methyl epicatechin-O-sulphate                                                         | n.d.      | 1297       | 100                      |
| Methyl catechin-O-glucuronide                                                         | n.d.      | 1429       | 100                      |
| Methyl epicatechin-O-glucuronide                                                      | n.d.      | 5612       | 100                      |
| 5-(4'-Hydroxyphenyl)- $\gamma$ -valerolactone-O-sulphate                              | n.d.      | 35573      | 100                      |
| 5-(3',4'-Dihydroxyphenyl)- $\gamma$ -valerolactone-O-sulphate                         | n.d.      | 380911     | 100                      |
| 5-(3',4'-Dihydroxyphenyl)- $\gamma$ -valerolactone-O-glucuronide                      | n.d.      | 2618       | 100                      |
| 5-(3',4'-Dihydroxyphenyl)- $\gamma$ -valerolactone-O-sulphate-O-glucuronide           | n.d.      | 2089       | 100                      |

The percentage increase in instrumental response is calculated by taking the difference between the barley instrumental response and the standard diet instrumental response, dividing this difference by the barley instrumental response, and then multiplying by 100.
